# Supplementary material for: TET2 Inhibits PD-L1 Gene Expression in Breast Cancer Cells through Histone Deacetylation
Source: MDPI journal article supplement (doi:10.3390/cancers13092207), 2021-05-04
Supplement: s1 [file s1]

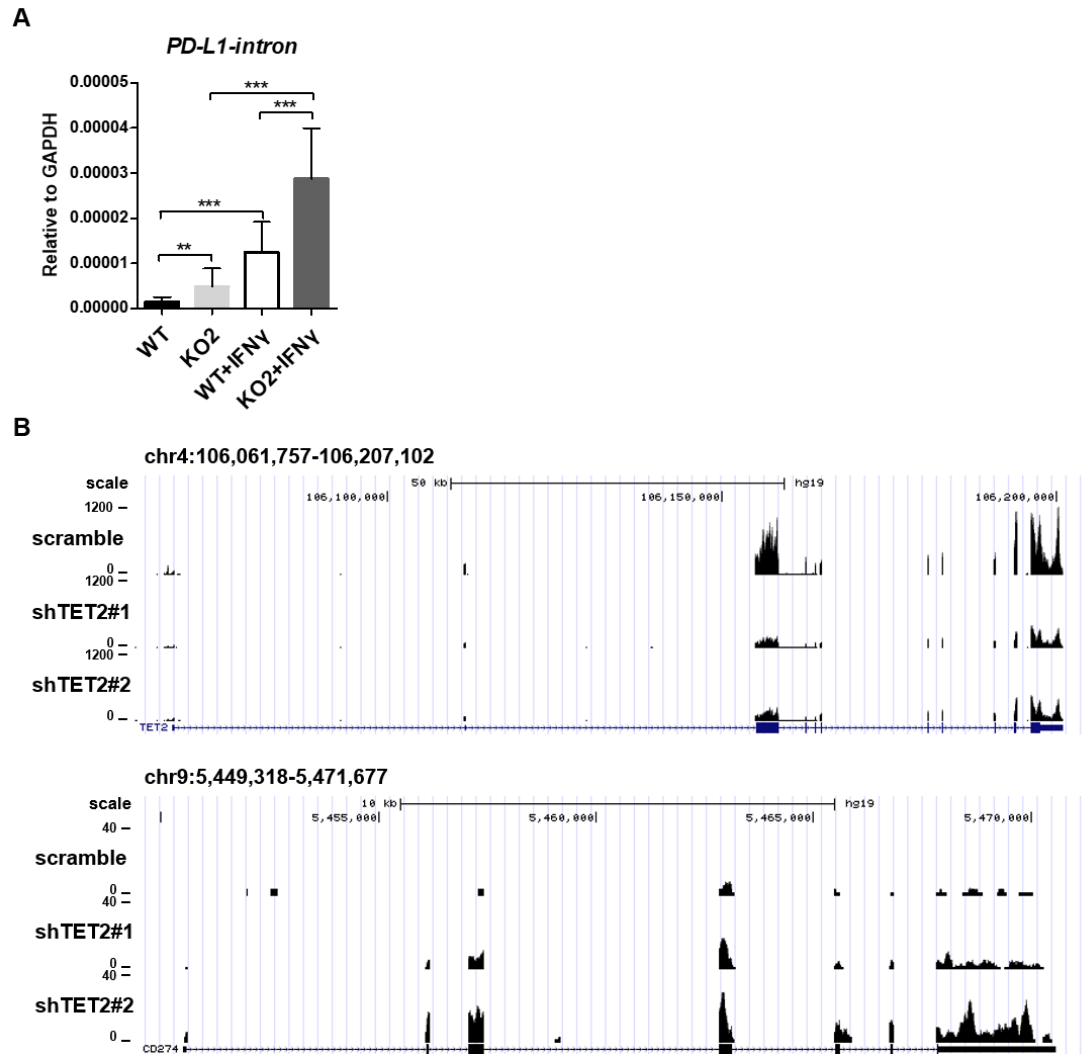

**Figure S1.** PD-L1 is negatively regulated by TET2 in MCF7 cells. (A) Relative mRNA expression of *PD-L1* intron in WT and *TET2* KO MCF7 cells treated with or without IFN-gamma. (B) RNA-seq snapshot of *TET2* and *PD-L1* (CD274) genes in scramble, TET2-shRNA#1, and TET2-shRNA#2 of MCF7. (\*\*\*,  $p < 0.001$ ).

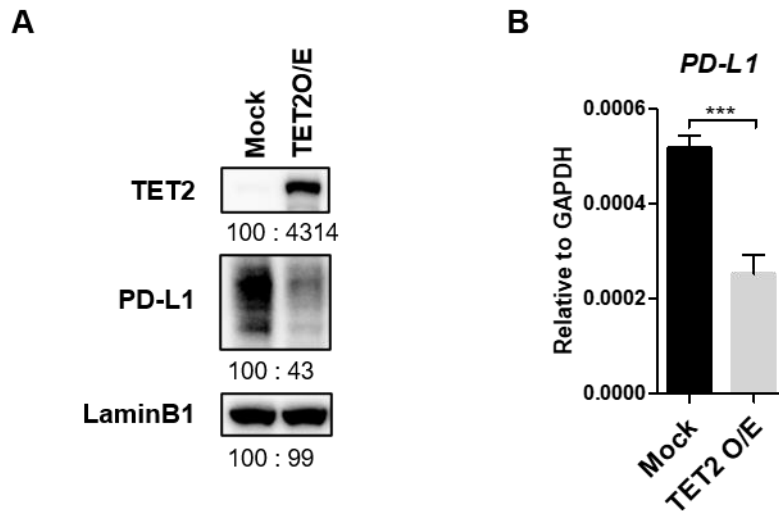

**Figure S2.** TET2 overexpression inhibits PD-L1 expression in MDA-MB-231 cells. **(A)** Western blot analysis of the PD-L1 protein levels in Mock and TET2-O/E of MDA-MB-231 cells. **(B)** RT-qPCR analysis of the relative mRNA expression levels of PD-L1 in Mock and TET2-O/E MDA-MB-231 cells. (\*\*\*,  $p < 0.001$ ).

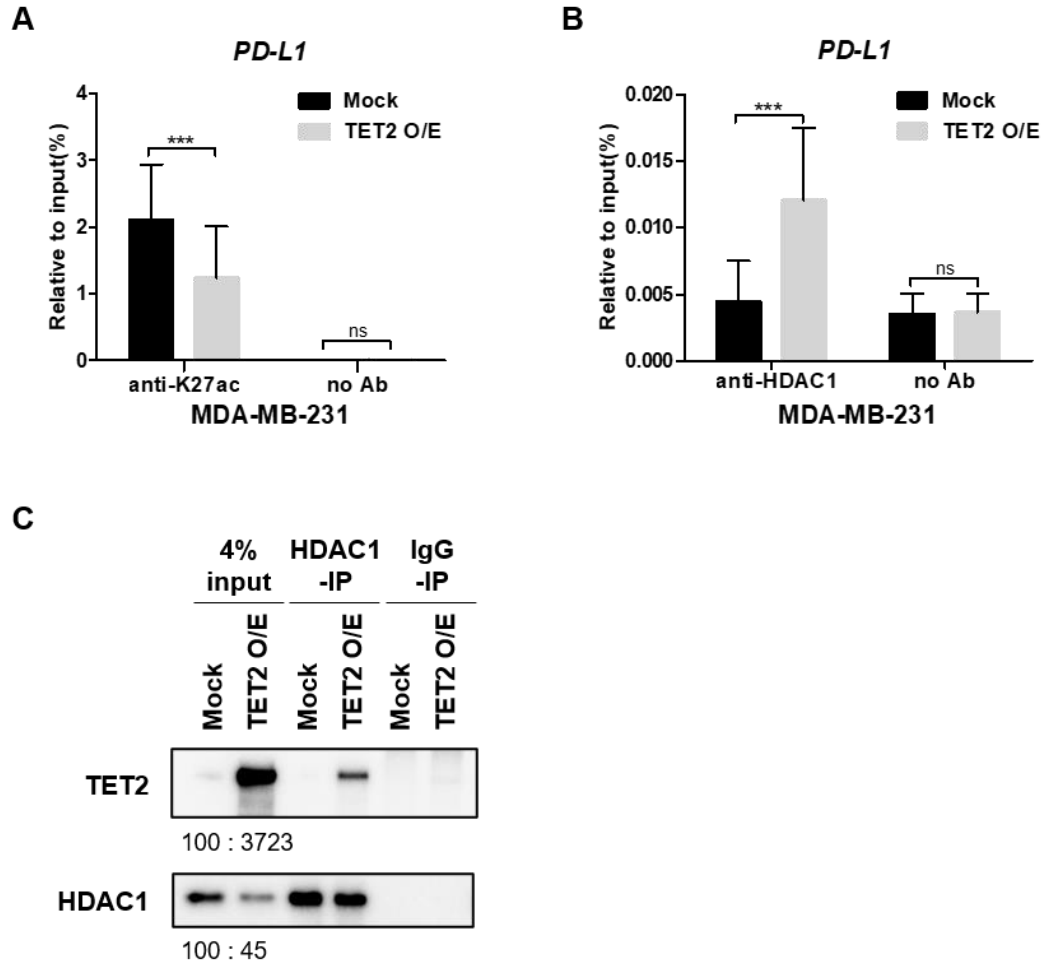

**Figure S3.** TET2 is required for H3K27 deacetylation and HDAC occupancy at *PD-L1* promoter in MDA-MB-231. (A) ChIP-qPCR analysis of H3K27ac enrichment at *PD-L1* (*CD274*) promoter in Mock and TET2-O/E MDA-MB-231 cells. (B) ChIP-qPCR analysis of HDAC1 occupancy at *PD-L1* (*CD274*) promoter in Mock and TET2-O/E MDA-MB-231 cells. (C) Western blot analysis of immunoprecipitation products with HDAC1 in Mock and TET2-O/E MDA-MB-231 cells. (\*\*\*,  $p < 0.001$ ).

Figure 1D

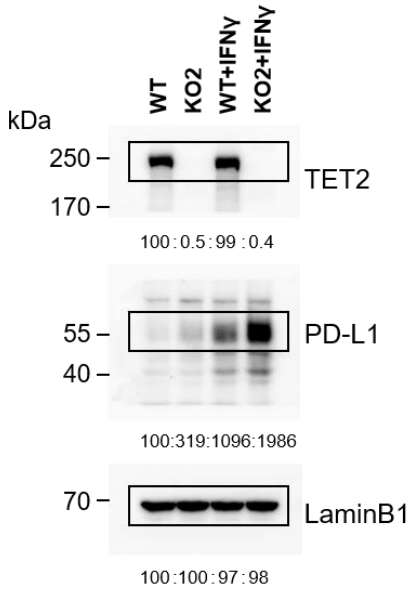

Figure 3F

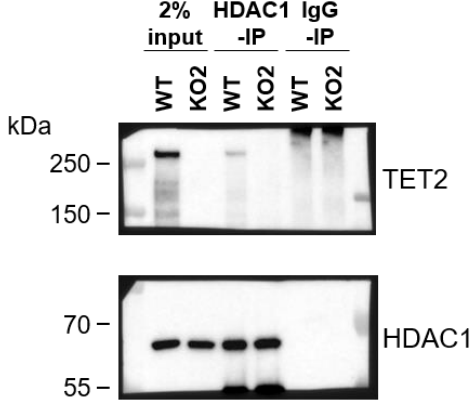

Figure 3G

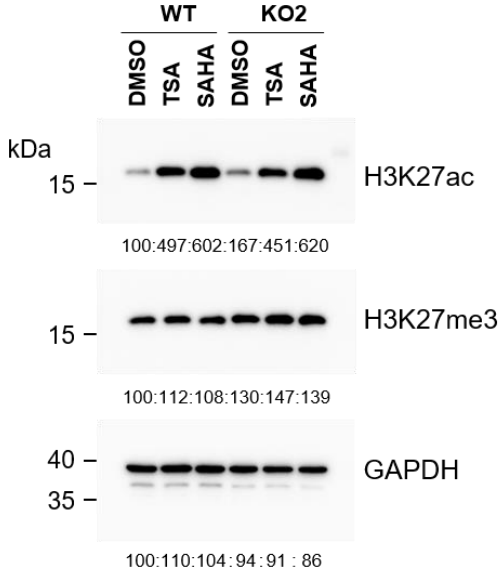

**Figure S2A**

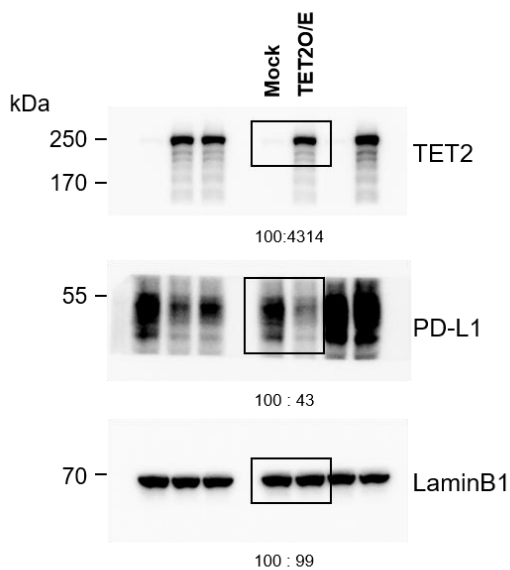

**Figure S3C**

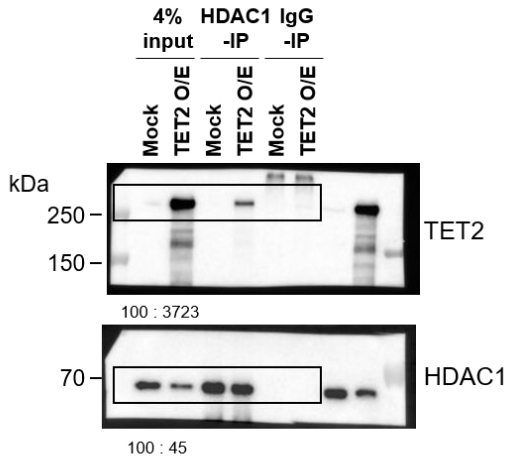

**Figure S3D**

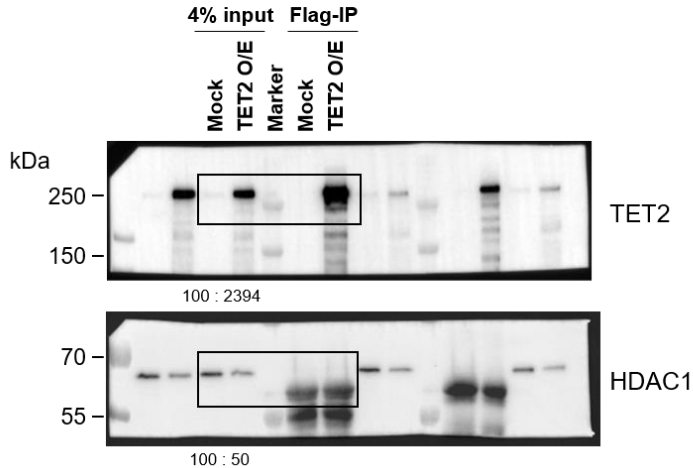

**Figure S4:** original Western blot figure.

**Table S1.** CCLE data analysis of TET2 and PD-L1 mRNA levels in most cancer cell lines.

| Cancer type                        | n   | R <sup>2</sup> | Correlation | p value  | Significance |
|------------------------------------|-----|----------------|-------------|----------|--------------|
| Lung                               | 192 | 0.09761        | negative    | < 0.0001 | ***          |
| Breast                             | 57  | 0.148          | negative    | 0.0031   | **           |
| Soft tissue                        | 31  | 0.2387         | negative    | 0.0053   | **           |
| Oesophagus                         | 27  | 0.1354         | no          | 0.0589   | ns           |
| Ovary                              | 47  | 0.04145        | no          | 0.1699   | ns           |
| Pancreas                           | 41  | 0.04153        | no          | 0.2013   | ns           |
| Prostate                           | 8   | 0.2133         | no          | 0.2493   | ns           |
| Bone                               | 28  | 0.05037        | no          | 0.2509   | ns           |
| Haematopoietic and lymphoid tissue | 176 | 0.006719       | no          | 0.2795   | ns           |
| Central nervous system             | 66  | 0.009155       | no          | 0.4447   | ns           |
| Kidney                             | 32  | 0.01614        | no          | 0.4884   | ns           |
| Upper aerodigestive tract          | 32  | 0.01608        | no          | 0.4892   | ns           |
| Stomach                            | 37  | 0.01324        | no          | 0.4977   | ns           |
| Thyroid                            | 11  | 0.04645        | no          | 0.5245   | ns           |
| Urinary tract                      | 26  | 0.005706       | no          | 0.7138   | ns           |
| Pleura                             | 11  | 0.009987       | no          | 0.77     | ns           |
| Biliary tract                      | 8   | 0.009115       | no          | 0.8221   | ns           |
| Autonomic ganglia                  | 16  | 0.00337        | no          | 0.8309   | ns           |
| Skin                               | 56  | 0.0005454      | no          | 0.8643   | ns           |
| Endometrium                        | 28  | 0.0009414      | no          | 0.8768   | ns           |
| Liver                              | 25  | 0.00003252     | no          | 0.9784   | ns           |
| Large intestine                    | 59  | 0.000005063    | no          | 0.9865   | ns           |

**Table S2.** CCLE data analysis of TET2 and PD-L1 expression in subtypes of breast cancer.

| Breast cancer subtype | n  | R <sup>2</sup> | Correlation | p value | Significance |
|-----------------------|----|----------------|-------------|---------|--------------|
| Luminal               | 20 | 0.2404         | negative    | 0.0282  | *            |
| Her2-enriched         | 9  | 0.0685         | no          | 0.4963  | ns           |
| Basal-like            | 28 | 0.1063         | no          | 0.0904  | ns           |

**Table S3.** TCGA data analysis of TET2 and PD-L1 expression in subtypes of breast cancer.

| Breast cancer subtype | n   | R <sup>2</sup> | Correlation | p value | Significance |
|-----------------------|-----|----------------|-------------|---------|--------------|
| luminal B             | 461 | 0.0201         | negative    | 0.0023  | **           |
| Her2-enriched         | 220 | 0.02008        | negative    | 0.0357  | *            |
| luminal A             | 679 | 0.001447       | no          | 0.3223  | ns           |
| Basal-like            | 199 | 0.0006601      | no          | 0.7187  | ns           |

**Table S4.** Primers used in the study.

| Gene name                                   | Primers sequence      | Notes                                                                 |
|---------------------------------------------|-----------------------|-----------------------------------------------------------------------|
| <b>RT-qPCR primers</b>                      |                       |                                                                       |
| GAPDH_F                                     | CTGACTTCAACAGCGACACC  |                                                                       |
| GAPDH_R                                     | GTGGTCCAGGGGTCTTACTC  |                                                                       |
| PD-L1_F                                     | TCTGGACAAGCAGTGACCATC |                                                                       |
| PD-L1_R                                     | CAGTGTGCTGGTCACATTGAA |                                                                       |
| PD-L1-intron_F                              | CCCCAACCTGAATGAGCCAT  |                                                                       |
| PD-L1-intron_R                              | GTGAGGGACGAAAAGGCAGA  |                                                                       |
| TET2_F                                      | CCACCTCATCTCAAGCTGCA  |                                                                       |
| TET2_R                                      | GATCCATCGGCTGAGACTGG  |                                                                       |
| <b>ChIP-qPCR, MeDIP/hMeDIP-qPCR primers</b> |                       |                                                                       |
| CD274p_F                                    | AACTGAAAGCTTCCGCCGATT | For ChIP of<br>TET2,HDAC1/2,H3K4me3 and<br>H3K27me3; for MeDIP/hMeDIP |
| CD274p_R                                    | ATCCAGTTTGCCGGGCG     |                                                                       |
| K27ac-CD274p-F                              | GGGGGACGCCTTTCTGATAA  | For ChIP of H3K27ac                                                   |
| K27ac-CD274p-R                              | AAGCCAACATCTGAACGCAC  |                                                                       |
